# Supplementary material for: Increased Levels of Plasma Alzheimer’s Disease Biomarkers and Their Associations with Brain Structural Changes and Carotid Intima-Media Thickness in Cognitively Normal Obstructive Sleep Apnea Patients
Source: MDPI journal article supplement (doi:10.3390/diagnostics12071522), 2022-06-22
Supplement: s1 [file s1]

**Supplementary Table S1.** Correlations between cognitive function and plasma biomarkers, clinical parameters, and volumes of right precuneus

|                  |   | Digit span | Orientation | Information | Comprehension | Drawing |
|------------------|---|------------|-------------|-------------|---------------|---------|
| T-tau            | r | -0.083     | 0.044       | 0.081       | -0.054        | 0.126   |
|                  | p | 0.513      | 0.729       | 0.525       | 0.674         | 0.322   |
| A $\beta$ 42     | r | 0.050      | -0.031      | 0.157       | 0.176         | 0.139   |
|                  | p | 0.695      | 0.810       | 0.216       | 0.264         | 0.274   |
| A $\beta$ 40     | r | 0.105      | -0.108      | -0.034      | 0.017         | -0.074  |
|                  | p | 0.411      | 0.395       | 0.788       | 0.897         | 0.560   |
| AHI              | r | 0.017      | -0.118      | -0.161      | -0.149        | -0.190  |
|                  | p | 0.910      | 0.431       | 0.279       | 0.319         | 0.200   |
| IMT              | r | 0.214      | 0.074       | 0.182       | -0.250        | -0.139  |
|                  | p | 0.255      | 0.698       | 0.336       | 0.283         | 0.462   |
| Precuneus volume | r | -0.024     | 0.168       | 0.201       | 0.165         | 0.078   |
|                  | p | 0.850      | 0.185       | 0.111       | 0.192         | 0.541   |
